# Supplementary material
Source: bioRxiv or medRxiv preprint supplement (https://www.biorxiv.org/highwire/filestream/96548/field_highwire_adjunct_files/0/315085-1.pdf)
Supplement: Supplementary file [file 315085-1.pdf]

1 **Supplementary Materials:**

2 **Materials and Methods**

3 **Strain construction**

4 For a listing of strains used in figures, see Table S1. All strains are derivatives of *B. subtilis* 168  
5 *trpC2* unless otherwise noted. For additional details of strain and plasmid construction, see Tables  
6 S2 and S3, respectively.

7 **Media and culture conditions**

8 *B. subtilis* cultures were grown in the chemically defined minimal medium S7 (1), modified from  
9 (2), supplemented with trace elements (3) and L-tryptophan to early log phase. For all  
10 experiments shown, cells were grown to early log phase,  $OD_{600} \sim 0.1-0.2$ . Dilutions for  $OD_{600}$   
11 matching, if required, were no more than 1:3.

12 **Microscopy & image analysis**

13 Microscopy was performed on live cells immobilized on 1% agarose pads prepared with S7  
14 media. Imaging was performed using a Nikon 90i or a TE2000 microscope with a 100x Phase  
15 contrast objective (CFI Plan Apo Lambda DM 100x Oil, NA 1.45), an X-Cite light source, a  
16 Hamamatsu Orca ER-AG, and the following filter cubes: YFP (ET Sputter 500/20x, Dm515,  
17 535/30m), and mCherry (ET Sputter Ex560/40 Dm585 Em630/75). To generate representative  
18 fields of log phase cultures, cultures were concentrated  $\sim 20-100x$  immediately prior to imaging.  
19 Images were processed using Fiji(4).

20 Quantitative measurement of gene expression was performed similarly to (5). Briefly, phase  
21 contrast and fluorescence images (e.g., YFP, mCherry) were acquired of well separated bacterial  
22 cells immobilized on agarose pads. The resulting image stacks were segmented based on the  
23 phase contrast image, and the corresponding average fluorescence per pixel within each cell was

24 calculated for each fluorescence channel using Matlab. A non-fluorescent control strain, treated  
25 with antibiotics as needed, was used as a control to subtract background and autofluorescence  
26 in each channel.

### 27 **Luminescence assays**

28 Luminescence assays were performed as described (6) with the following modifications. The  
29 cultures were initially grown to early log phase in a roller drum at 37°C. 150 µl of each culture was  
30 then loaded into each well and 100 µg/ml bacitracin was added as indicated. Luminescence and  
31 OD<sub>600</sub> were measured at 5 min intervals and the values of all samples at a defined time point after  
32 the luminescence reached ~steady state, about 1h post treatment, are reported.

### 33 **Flow cytometry and cell sorting**

34 Cultures were grown to early log phase and diluted 2-4 fold with additional S7 media to obtain the  
35 optimal density for flow cytometry. The resulting samples were vortexed vigorously prior to  
36 measurement to disrupt aggregates. Flow cytometry and sorting were performed on a BD  
37 Biosciences FACS Aria II-SORP. YFP was detected using a blue laser (488 nm) with a 525/50  
38 dichroic, and a 505 long pass filter. mCherry was detected using a yellow/green laser (561 nm)  
39 with a 582/15 dichroic, and a 570 long pass filter. Fluorescence values were quantitatively  
40 compared between experiments by rescaling each experiment by the mean fluorescence of a  
41 control sample. Sorting was performed with a 70 nm nozzle at 70 PSI. Detection voltages were  
42 set such that the non-fluorescent control had a median value of ~100.

### 43 **Survival assays**

44  $1.5 \times 10^4$  cells were sorted by fluorescence, and dispensed into equal volumes of chemically  
45 defined growth media (S7). Cultures were incubated in a roller drum at 37°C for 10 min, then  
46 treated with 500 ng/ml ciprofloxacin for 3.5h. Serial dilutions of each population were plated for  
47 colony forming units (CFUs) on LB and grown overnight at 30°C and survival ratios were

48 calculated by comparing the CFU values between the high and low fluorescence groups. In each  
49 experiment, wild-type and mutant strains were tested in parallel.

#### 50 **Autofluorescence deconvolution method and validation**

51 For each flow cytometry experiment, data from both *sasA* reporter strains and a non-fluorescent  
52 control were measured. Raw measurements of fluorescence intensities from transcriptional  
53 reporter strains have two contributions: (i) the transcriptional reporter for *sasA* expression (e.g.  
54  $P_{sasA-yfp}$ ), the signal of interest; and (ii) background fluorescence originating from other sources.  
55 Measuring the statistics of the background fluorescence using a non-fluorescent control allowed  
56 extraction (deconvolution) of the *sasA* transcriptional reporter signal from the total raw  
57 measurement consisting of the sum of this signal and background fluorescence (7). This was  
58 done by calculating the mean and variance of the measured raw fluorescence signal from reporter  
59 strains, and, separately, the background fluorescence signal measured using the non-fluorescent  
60 control. Numerical estimates for the statistics of the signal of interest from the *sasA* transcriptional  
61 reporter were then obtained by assuming that this signal is not correlated with background  
62 fluorescence. (This assumption is supported by fluorescence microscopy experiments showing  
63 that cell size was not well correlated with *sasA* expression, and by computationally verifying that  
64 simple forms of dependency are inconsistent with the observed data.) The mean and variance of  
65 fluorescence from the *sasA* transcriptional reporter could then be uniquely determined, as  
66 described in more detail in the mathematical details of the deconvolution procedure. We used a  
67 Gamma distribution to model the distribution of the fluorescence signal for a given mean and  
68 variance. The Gamma distribution is routinely applied to fit gene expression data (8), but here we  
69 additionally verified that it closely mimics the underlying signal coming from the reporter by an *in-*  
70 *silico* re-convolution of the Gamma-distribution-fitted autofluorescence-free signal with measured  
71 background fluorescence. The resulting total fluorescence statistics closely resemble those that

72 were originally measured (Fig. S3). We separately verified that other distribution choices, such as  
73 lognormal, did not capture the data as well.

74

#### 75 **Mathematical details of deconvolution procedure**

76 The raw fluorescence intensity ( $R$ ) measured from transcriptional reporter strains were assumed  
77 to have two statistically independent contributions. One coming from the signal of interest ( $S$ ), and  
78 one coming from other sources, collectively treated here as noise ( $N$ ). One then has

$$79 \quad R = S + N ,$$

80 for every measurement taken, and averaging over all measurements immediately gives the  
81 following relation

$$82 \quad \langle R \rangle = \langle S \rangle + \langle N \rangle$$

83 between the mean fluorescence values of the raw fluorescence intensity, the signal of interest,  
84 and the noise. Statistical independence then asserts that the variance in the fluorescence intensity  
85 could also be decomposed in a similar way

$$86 \quad \text{Var}(R) = \text{Var}(S) + \text{Var}(N) .$$

87 These relations, and the fact  $\langle R \rangle$ ,  $\langle N \rangle$ ,  $\text{Var}(R)$ ,  $\text{Var}(N)$  could all be directly computed from  
88 measured data allowed us to estimate the mean,  $\langle S \rangle$ , and variance,  $\text{Var}(S)$ , of the signal of  
89 interest. The full distribution of the signal of interest was then assumed to be well described by a  
90 Gamma distribution, since this has previously been shown to correctly describe gene expression  
91 data in bacteria (8) and we have moreover verified that this assumption is internally consistent  
92 with the data (materials and methods). The probability density function describing  $S$  was therefore  
93 modeled as

94 
$$f(s) = \frac{1}{\Gamma(k)\theta^k} s^{k-1} e^{-s/\theta},$$

95 where  $\Gamma(\cdot)$  denotes the gamma function, and the parameters  $k$  and  $\theta$  are uniquely set by their  
96 relations to the mean

97 
$$\langle S \rangle = k\theta,$$

98 and variance

99 
$$\text{Var}(S) = k\theta^2,$$

100 of the signal.

101

## 102 **Mathematical details of enrichment model**

103 Deconvolved fluorescence intensities of cells before,  $f_b(s)$ , and after,  $f_a(s)$ , ciprofloxacin  
104 treatment were modeled by the Gamma distribution to test the hypothesis that they are related  
105 via

106 
$$f_a(s) = C \cdot f_b(s) \cdot p(s),$$

107 where  $p(s)$  stands for the probability of a cell with fluorescence intensity  $s$  to survive the  
108 prescribed treatment and  $C$  is a normalization constant assuring that

109 
$$\int_0^{\infty} f_a(s) ds = \int_0^{\infty} C \cdot f_b(s) \cdot p(s) ds = 1.$$

110 Following treatment, we define the enrichment factor (in the probability density) of cells with  
111 fluorescence level  $s$  as

112 
$$EF(s) = f_a(s)/f_b(s).$$

113 One could then write the ratio between the survival probability of cells with fluorescence  $s_1$  and  
114  $s_2$  (Survival Ratio) in the following way

115 
$$\text{Survival Ratio} = \frac{p(s_1)}{p(s_2)} = \frac{C \cdot p(s_1)}{C \cdot p(s_2)} = \frac{f_a(s_1)/f_b(s_1)}{f_a(s_2)/f_b(s_2)}.$$

116 This relation was then used to predict survival ratios and compare with data as described in the  
117 main text.

118

119

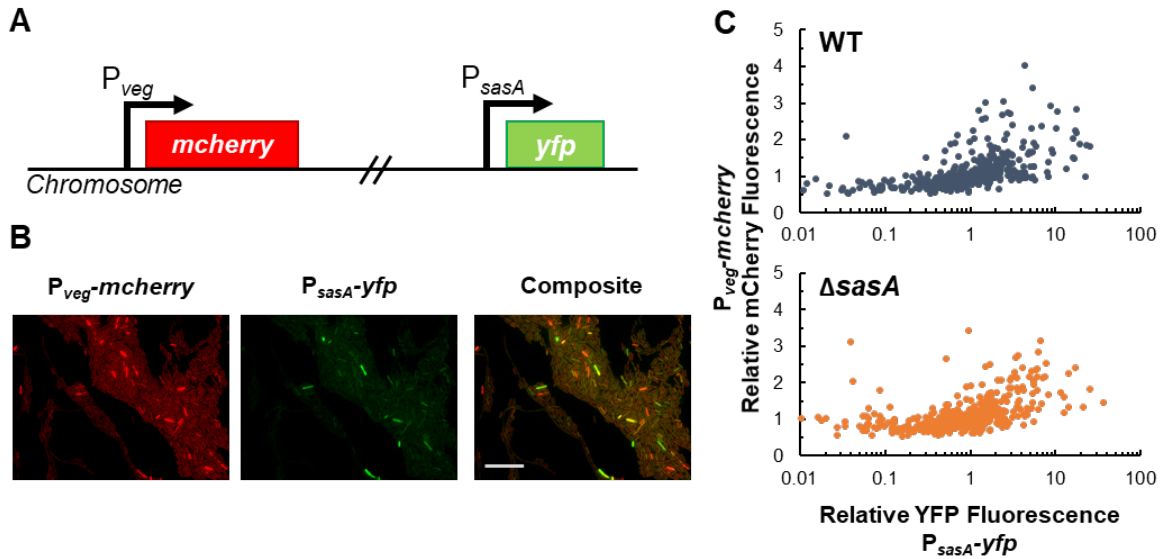

120

121 **Figure S1: Comparison of  $P_{sasA}$ -*yfp* and the constitutive reporter  $P_{veg}$ -*mcherry***

122 **A)** Schematic of dual-color transcriptional reporter strain used to measure the correlation in  
 123 the expression of *sasA* and *veg*. Two transcriptional reporters,  $P_{veg}$ -*mcherry* and  $P_{sasA}$ -  
 124 *yfp* are inserted at ectopic loci.

125 **B)** Correlation of  $P_{veg}$  and  $P_{sasA}$  activity in single cells. Individual fluorescence channels and  
 126 a composite image of a dual reporter strain  $P_{sasA}$ -*yfp*  $P_{veg}$ -*mcherry* in log phase growth.  
 127 **Left:**  $P_{veg}$ -*mcherry* reporter displays cell-to-cell variability. **Center:**  $P_{sasA}$ -*yfp* reporter in  
 128 the same population displays cell-to-cell variability. **Right:** Composite image with  
 129 mCherry and YFP images. Scale bar indicates 10  $\mu$ m.

130 **C)** Quantification of the correlation between  $P_{sasA}$ -*yfp* and  $P_{veg}$ -*mcherry* expression in single  
 131 cells in an otherwise WT (**top**) or a  $\Delta sasA$  (**bottom**) background. Cellular fluorescence  
 132 intensities were measured for single cells described in (**A,B**) in 4 experiments (at least  
 133 540 cells). Relative fluorescence is the fluorescence of each individual cell relative to the  
 134 mean fluorescence of the population in each channel and is plotted on a linear scale  
 135 (mCherry) or a log scale (YFP). The Pearson's correlation coefficients of the relative

136 fluorescence values are WT:  $r \sim 0.50 \pm 0.0084$ ,  $\Delta sasA$ :  $r \sim 0.52 \pm 0.099$  (mean  $\pm$  SEM, 4  
137 experiments).

138



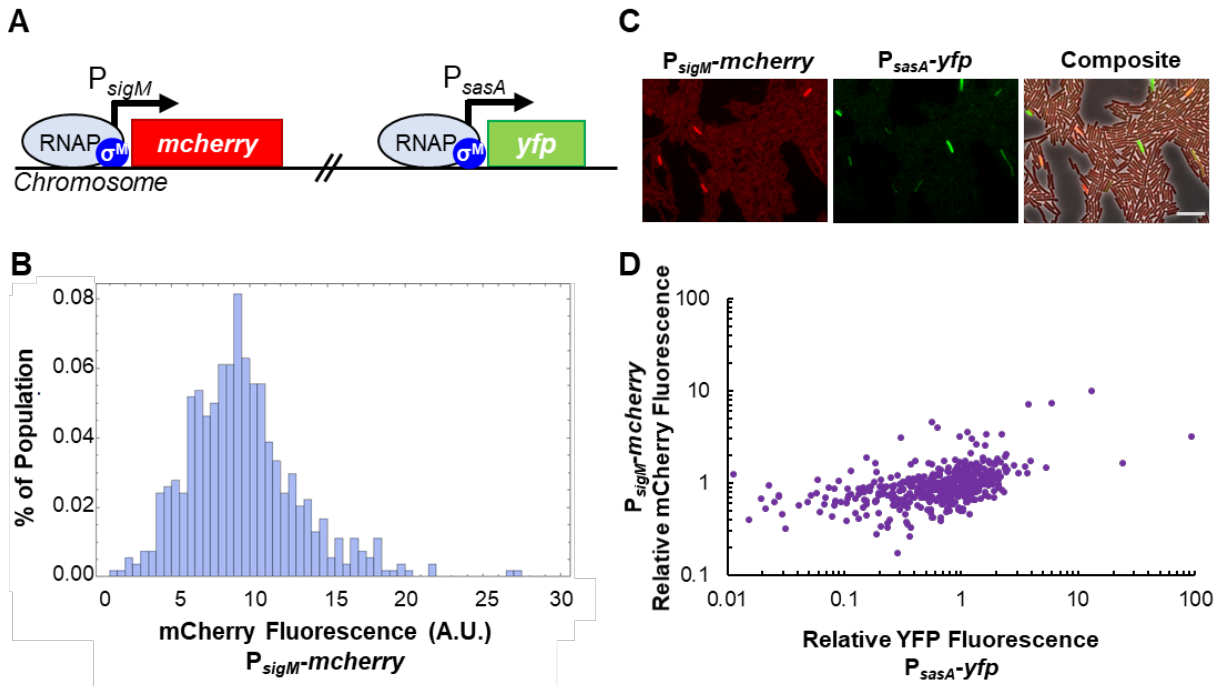

139

140 **Figure S2: Correlation of cell-to-cell variability in *sigM* and *sasA***

141 **A)** Schematic of dual-color transcriptional reporter strain used to measure the correlation in  
 142 the expression in *sasA* and *sigM*. Two transcriptional reporters,  $P_{sigM}$ -*mcherry* and  $P_{sasA}$ -  
 143 *yfp*, are inserted at ectopic loci. Both *sigM* and *sasA* transcription use the alternative  
 144 sigma factor  $\sigma^M$  (SigM) of RNAP.

145 **B)** Quantification of the distribution of  $P_{sigM}$ -*mcherry* expression in a log phase culture in the  
 146 absence of a specific inducing stress. Histogram of the mCherry fluorescence intensities  
 147 per cell, background subtracted, for ~540 individual cells. The CV  $\sim 0.77 \pm 0.098$  (SEM,  
 148 3 experiments).

149 **C)** Correlation of  $P_{sigM}$  and  $P_{sasA}$  activity in single cells. Fluorescence and composite phase  
 150 contrast images of the dual reporter strain  $P_{sasA}$ -*yfp*  $P_{sigM}$ -*mcherry* in log phase growth.  
 151 **Left:**  $P_{sigM}$ -*mcherry* reporter displays cell-to-cell variability. **Center:**  $P_{sasA}$ -*yfp* reporter in  
 152 the same population displays cell-to-cell variability. **Right:** Composite image with phase  
 153 contrast, mCherry, and YFP images. Scale bar indicates 10  $\mu$ m.

154 **D)** Quantification of the correlation between  $P_{sasA-yfp}$  and  $P_{sigM-mcherry}$  expression in single  
155 cells. Cellular fluorescence intensities were measured for single cells described in **(A,C)**.  
156 The Pearson's correlation coefficient of the relative fluorescence values is  $r \sim 0.35 \pm$   
157  $0.087$  (SEM, 3 experiments).

158

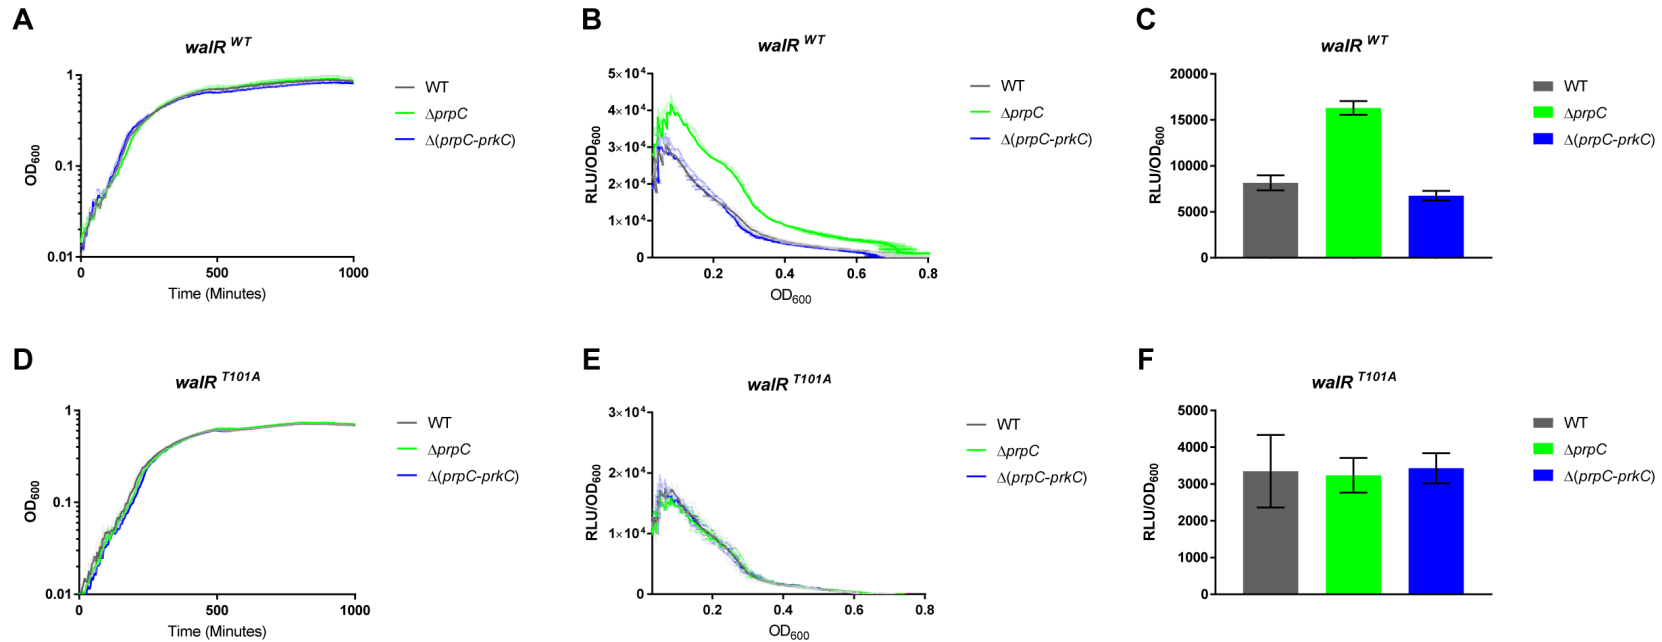

159

160 **Figure S3: PrkC regulates *yocH* during log phase growth in minimal media.**

161 **A)** Growth curves of *P<sub>yocH</sub>-luxABCDE* in WT (gray),  $\Delta prpC$  (green), and  $\Delta(prpC-prkC)$  (dark blue) in an otherwise wild type  
 162 background in the chemically defined minimal medium S7-glucose. Time indicates minutes post  $OD_{600} \sim 0.01$  for each  
 163 genotype. For all graphs solid lines indicate the means of 3 experimental replicates, and the shading indicates the standard  
 164 deviation.

165 **B)** Relative luminescence units (RLU) /  $OD_{600}$  as a function of  $OD_{600}$  for the experiment shown in **A**. Throughout log phase, the  
 166 normalized reporter activity in the  $\Delta prpC$  background is significantly higher than WT or a  $\Delta(prpC-prkC)$  background.

167 **C)** Detail of relative *P<sub>yocH</sub>-luxABCDE* reporter activity (RLU/ $OD_{600}$ ) at  $OD_{600} \sim 0.3$ .

168 **D-F)** A similar experiment to **A-C** was performed in a *walR T101A* background.

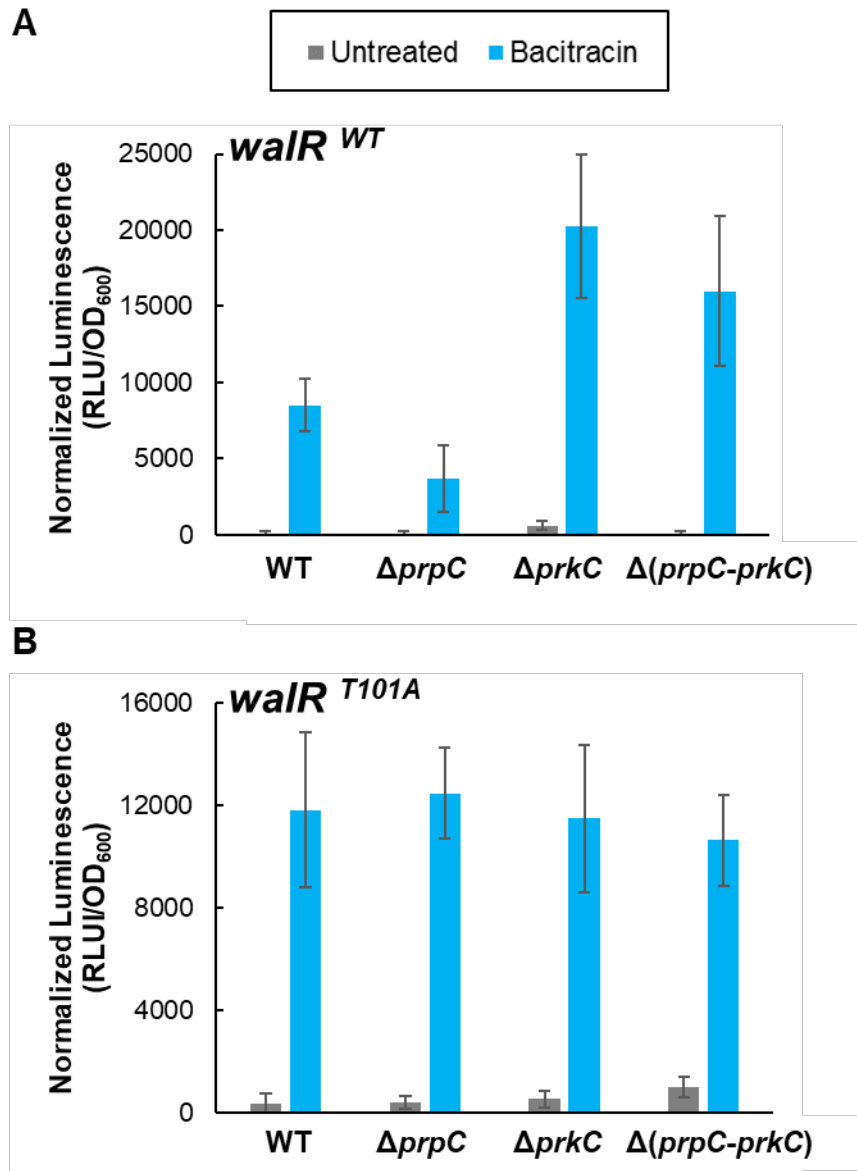

169

170 **Figure S4: The Ser/Thr kinase PrkC regulates average *sasA* induction through WalR**

171 **T101~P.**

172 **A)** The Ser/Thr kinase PrkC and its partner phosphatase PrpC regulate *sasA* under  
 173 inducing conditions. In the absence of induction, *sasA* expression is very low (gray).

174 Bacitracin (blue) induces *sasA* expression amplifying relative changes.

175 The average induction of *sasA* without (gray) and with bacitracin treatment (blue) was

176 measured in otherwise WT,  $\Delta prpC$ ,  $\Delta prkC$ , or  $\Delta(prpC-prkC)$  backgrounds using a  $P_{sasA}$ -

177 *lux* reporter. A >4 fold change is observed between the  $\Delta prpC$  and  $\Delta(prpC-prkC)$   
178 backgrounds, indicating that PrkC activity represses *sasA*. Bars and lines indicate the  
179 mean and standard deviation, respectively, of at least 3 biological replicates.

180 **B)** PrkC-dependent *sasA* regulation is abrogated in a non-phosphorylatable *walR T101A*  
181 mutant background. The average relative induction of *sasA* without (gray) and with  
182 bacitracin treatment (blue) was measured as in **(A)**, but in a *walR T101A* mutant  
183 background. No significant difference between genetic backgrounds is observed.

184

185

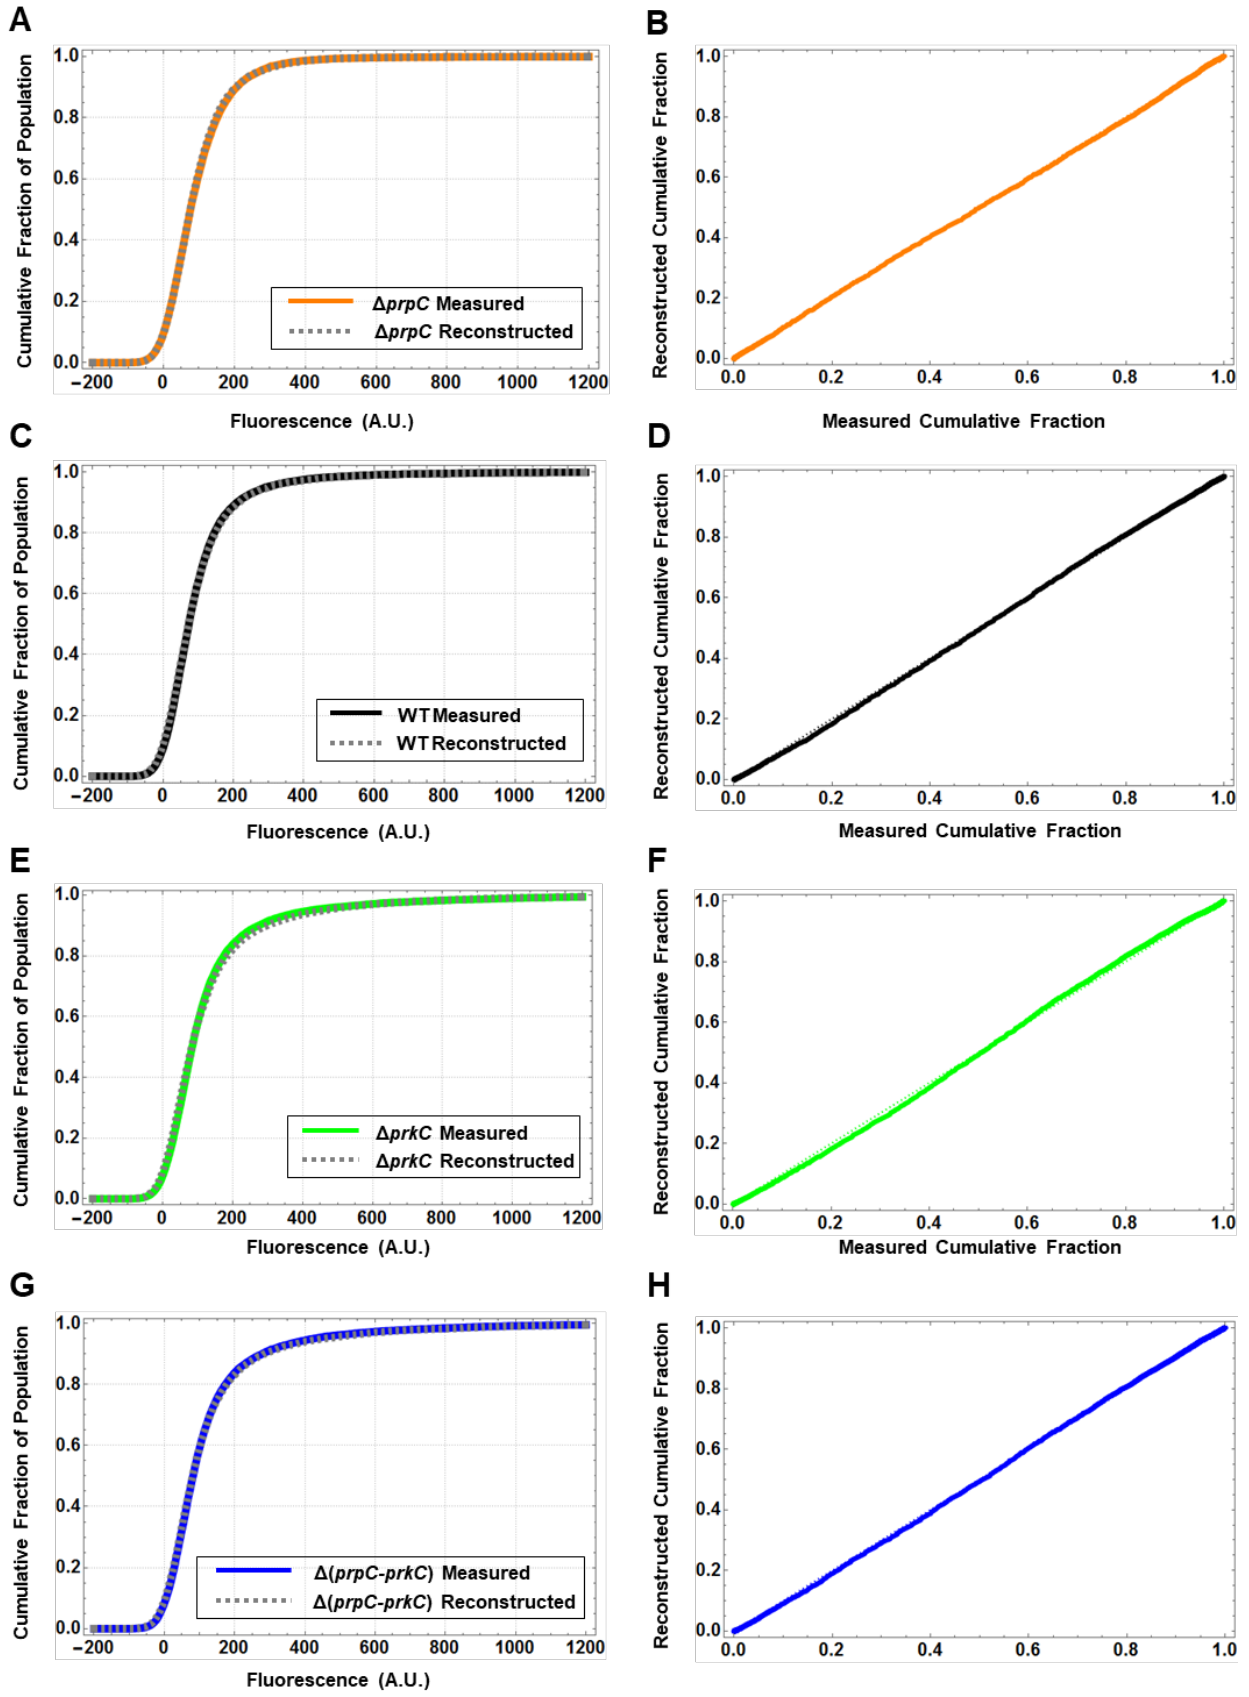

187 **Figure S5: Validation of the autofluorescence deconvolution method used in Figure 2.**

188 Comparison of the measured fluorescence distributions from Fig. 2B and reconstructed  
189 distributions based on the deconvolution algorithm (main text, methods). Plots of the  
190 cumulative distribution functions of the measured data sets (solid lines) and the data set  
191 numerically reconstructed (dashed lines) using the deconvolved data and the measured  
192 autofluorescence. This was repeated for each genotype **(A)**  $\Delta prpC$ , **(C)** WT, **(E)**  $\Delta prkC$ ,  
193 **(G)**  $\Delta(prpC-prkC)$ . To assess the agreement between the measured and reconstructed  
194 data sets for each, P-P plots were also used. For each data set the measured  
195 cumulative fraction was plotted against the reconstructed cumulative fraction (solid). A  
196 line with a slope of 1 (dashed), indicates perfect agreement. This process was repeated  
197 for **(B)**  $\Delta prpC$ , **(D)** WT, **(F)**  $\Delta prkC$ , and **(H)**  $\Delta(prpC-prkC)$ , and the presence of only very  
198 small deviations indicates very good agreement between the reconstructed and  
199 measured data sets.

200



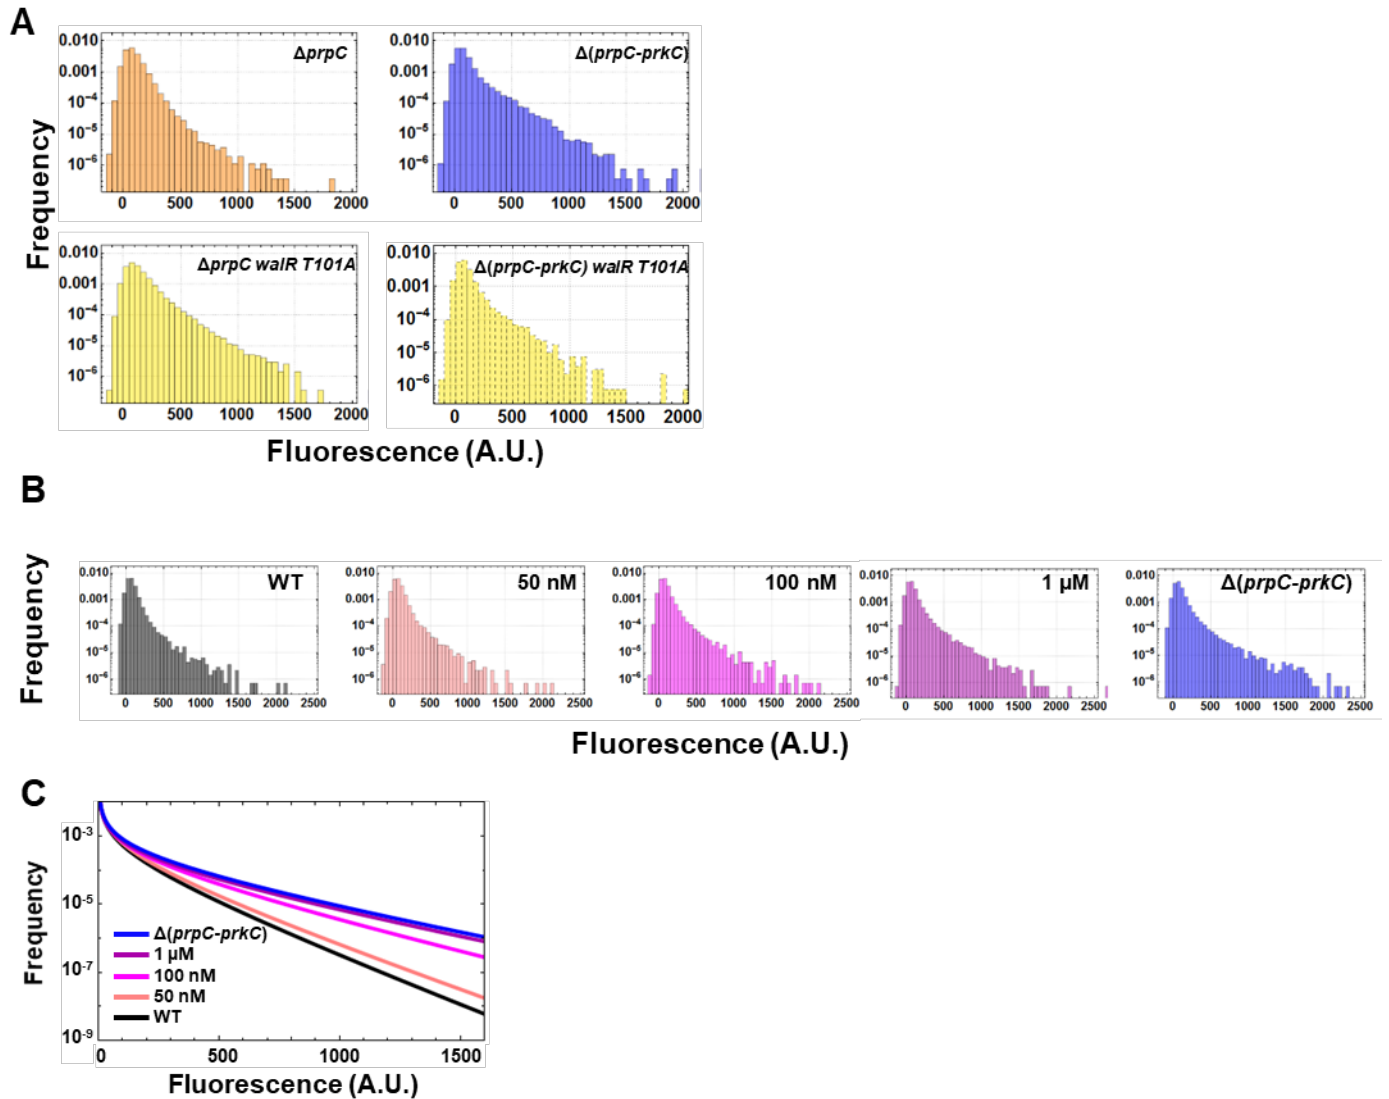

201

202 **Figure S6: Additional data sets used to generate Figure 3.**

203 **A) Histograms of measured data used to generate Figure 3C.**  $P_{sasA-yfp}$  reporter activity  
 204 was quantified by flow cytometry in a  $\Delta prpC walR T101A$  (yellow, solid) background and  
 205 compared to  $\Delta prpC$  (orange),  $\Delta(prpC-prkC)$  (blue), and  $\Delta(prpC-prkC) walR T101A$   
 206 (yellow, dashed) backgrounds in the same experiment. Each data set was obtained from  
 207  $\sim 6.0 \cdot 10^4$  events.

208

209

210 **B) Histograms of measured data used to generate Figure 3D.** The effect of  
211 staurosporine on *sasA* expression is dose-dependent.  $P_{sasA-yfp}$  reporter activity was  
212 quantified by flow cytometry during treatment with increasing concentrations of  
213 staurosporine: 0 (solvent only; black), 50, 100 nM, and 1  $\mu$ M (shades of magenta), in  
214 otherwise WT populations. For reference, the distribution of  $P_{sasA-yfp}$  in a  $\Delta(prpC-prkC)$   
215 (blue) population treated with solvent only was also measured in the same experiment.  
216 Each distribution was measured from data on  $\sim 3.0 \cdot 10^4$  events.

217 **C) Functional fits of autofluorescence-free distributions of *sasA* expression with increasing**  
218 **concentrations of staurosporine. A deconvolution algorithm was used to remove the**  
219 **contribution of autofluorescence from the measured distributions of *sasA* expression**  
220 **shown in B.**

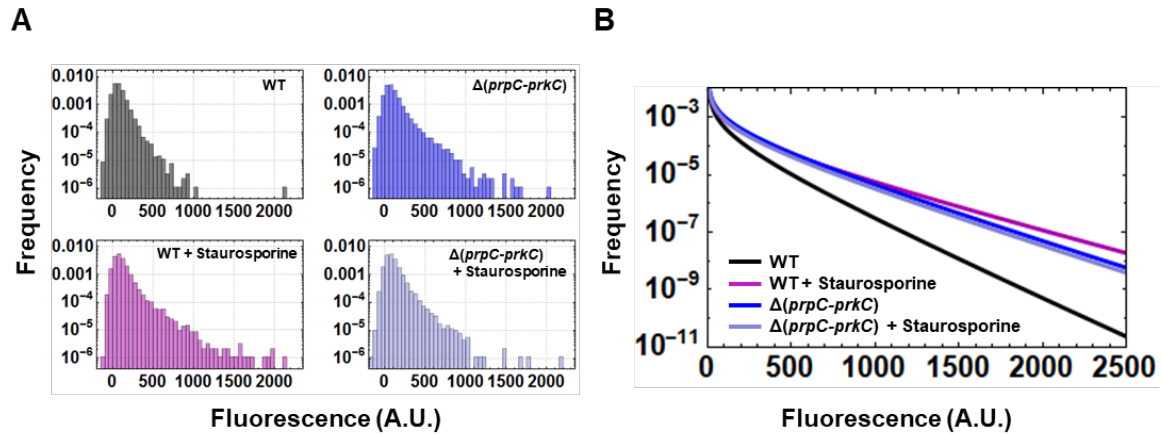

221

222 **Figure S7: Additional controls for the PrkC inhibition experiment shown in Fig 3.**

223 **A) The effect of staurosporine on *sasA* requires the PrkC/PrpC system.** Treatment with  
 224 the kinase inhibitor staurosporine results in a PrkC-dependent increase in the frequency  
 225 of cells with elevated *sasA* expression.  $P_{sasA-yfp}$  reporter activity was quantified by flow  
 226 cytometry in WT (black) or  $\Delta(prpC-prkC)$  (blue) untreated populations, and WT  
 227 (magenta) and  $\Delta(prpC-prkC)$  (light blue) treated populations treated with 1  $\mu$ M  
 228 staurosporine. Each distribution was measured from data on  $\sim 3.0 \cdot 10^4$  events.

229 **B) Deconvolution of data shown in A from cellular autofluorescence.**

230

231

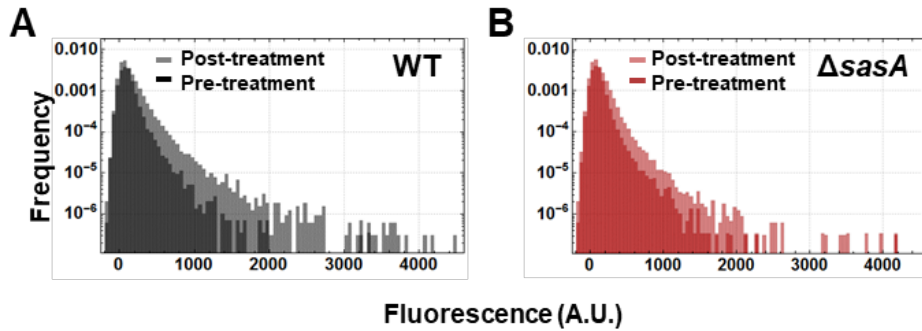

232

233 **Figure S8: Distributions of *sasA* expression pre- and post-ciprofloxacin treatment used to**  
 234 **generate the fits and model in Fig. 4.**

235 **A)** Antibiotic treatment results in an increase in the number of cells with elevated *sasA*  
 236 expression. Distributions of  $P_{sasA-yfp}$  expression in an otherwise wild type background  
 237 before (dark gray) and after (light gray) ciprofloxacin treatment. Data represents  $\sim 10^5$   
 238 events for each population.

239 **B)** Histograms of the distributions of  $P_{sasA-yfp}$  expression in a  $\Delta sasA$  background before  
 240 (dark red) and after (light red) ciprofloxacin treatment in a parallel experiment to **A**.

241

242

243 **Table S1. Strains in figures**

244

| <b>Figure</b> | <b>Panel</b>             | <b>Strains</b>                                                                      |
|---------------|--------------------------|-------------------------------------------------------------------------------------|
| <b>1</b>      | A<br>B, C, D             | ELB115<br>ELB344                                                                    |
| <b>2</b>      | B<br>C,D                 | ELB115, ELB116, ELB117, ELB330<br>ELB115, ELB116, ELB330, ELB371, ELB369B, ELB373   |
| <b>3</b>      | A,B<br>C<br>D            | ELB115, ELB116, ELB117, ELB330<br>ELB330, ELB116, ELB369B, ELB373<br>ELB115, ELB330 |
| <b>4</b>      | A<br>B<br>C<br>D,E,F     | ELB336, ELB340<br>ELB115<br>ELB331<br>ELB115, ELB331                                |
| <b>S1</b>     | B,C                      | ELB499, ELB450                                                                      |
| <b>S2</b>     | B,C,D                    | ELB348                                                                              |
| <b>S3</b>     | A,B,C<br>D,E,F           | ELB205, ELB211, ELB217<br>ELB243, ELB299, ELB249                                    |
| <b>S4</b>     | A<br>B                   | ELB80, ELB81, ELB82, ELB367<br>ELB359, ELB360, ELB362, ELB374                       |
| <b>S5</b>     | A,B<br>C,D<br>E,F<br>G,H | ELB116<br>ELB115<br>ELB117<br>ELB330                                                |
| <b>S6</b>     | A<br>B,C                 | ELB330, ELB116, ELB369B, ELB373<br>ELB115, ELB330                                   |
| <b>S7</b>     | A,B                      | ELB115, ELB330                                                                      |
| <b>S8</b>     | A<br>B                   | ELB115<br>ELB331                                                                    |

245

246

247 **Table S2: Strains Used in this Study**

| Strain                            | Genotype                                                                                                                        | Construction                          | Source          |
|-----------------------------------|---------------------------------------------------------------------------------------------------------------------------------|---------------------------------------|-----------------|
| <b><i>B. subtilis</i> strains</b> |                                                                                                                                 |                                       |                 |
| 168 <i>trpC2</i> (PB2)            | 168 <i>trpC2</i> (WT)                                                                                                           |                                       | Lab stock & (9) |
| PB702                             | PB2 $\Delta$ <i>prpC</i>                                                                                                        |                                       | “               |
| PB705                             | PB2 $\Delta$ <i>prkC</i>                                                                                                        |                                       | “               |
| PB722                             | PB2 $\Delta$ ( <i>prpC-prkC</i> )                                                                                               |                                       | “               |
| EB1385                            | $P_{sasA}$ - <i>luxABCDE mls bla</i><br>(Note <i>ywaC</i> has been renamed <i>sasA</i> .)                                       |                                       | (10)            |
| ELB80                             | $P_{sasA}$ - <i>luxABCDE mls bla</i>                                                                                            | Transformation of EB1385 into PB2.    | This study      |
| ELB81                             | $\Delta$ <i>prpC</i> $P_{sasA}$ - <i>luxABCDE mls bla</i>                                                                       | Transformation of EB1385 into PB702.  | “               |
| ELB82                             | $\Delta$ <i>prkC</i> $P_{sasA}$ - <i>luxABCDE mls bla</i>                                                                       | Transformation of EB1385 into PB705.  | “               |
| ELB113                            | <i>sacA</i> :: $P_{sasA}$ - <i>yfp cm</i>                                                                                       | Integration of pEL81 into PB2.        | “               |
| ELB115                            | <i>sacA</i> :: $P_{sasA}$ - <i>yfp cm</i>                                                                                       | Transformation of ELB113 into PB2.    | “               |
| ELB116                            | $\Delta$ <i>prpC</i> <i>sacA</i> :: $P_{sasA}$ - <i>yfp cm</i>                                                                  | Transformation of ELB113 into PB702   | “               |
| ELB117                            | $\Delta$ <i>prkC</i> <i>sacA</i> :: $P_{sasA}$ - <i>yfp cm</i>                                                                  | Transformation of ELB113 into PB705.  | “               |
| ELB166                            | $\Delta$ <i>sasA</i> :: <i>tet</i>                                                                                              | Integration of pEL98 into PB2.        | “               |
| ELB205                            | <i>sacA</i> :: $P_{yocH}$ - <i>luxABCDE</i>                                                                                     |                                       | (6)             |
| ELB211                            | $\Delta$ <i>prpC</i> <i>sacA</i> :: $P_{yocH}$ - <i>luxABCDE cm</i>                                                             |                                       | “               |
| ELB217                            | $\Delta$ ( <i>prpC-prkC</i> ) <i>sacA</i> :: $P_{yocH}$ - <i>luxABCDE cm</i>                                                    |                                       | “               |
| ELB243                            | <i>sacA</i> :: $P_{yocH}$ - <i>luxABCDE cm</i> ,<br><i>purA-kan-walRT101A</i>                                                   |                                       | “               |
| ELB249                            | $\Delta$ ( <i>prpC-prkC</i> ) <i>sacA</i> :: $P_{yocH}$ - <i>luxABCDE cm</i> ,<br><i>purA-kan-walRT101A</i>                     |                                       | “               |
| ELB299                            | $\Delta$ <i>prpC</i> <i>sacA</i> :: $P_{yocH}$ - <i>luxABCDE cm</i> ,<br><i>purA-kan-walRT101A</i>                              |                                       | “               |
| ELB330                            | $\Delta$ ( <i>prpC-prkC</i> ) <i>sacA</i> :: $P_{sasA}$ - <i>yfp cm</i>                                                         | Transformation of ELB113 into PB722.  | This study      |
| ELB331                            | $\Delta$ <i>sasA</i> :: <i>tet</i> <i>sacA</i> :: $P_{sasA}$ - <i>yfp cm</i>                                                    | Transformation of ELB166 into ELB115. | “               |
| ELB332                            | <i>amyE</i> :: $P_{ilvA}$ - <i>mcherry spec</i>                                                                                 | Integration of pEL152 into PB2.       | “               |
| ELB336                            | <i>sacA</i> :: $P_{sasA}$ - <i>yfp cm</i> <i>amyE</i> :: $P_{ilvA}$ - <i>mcherry spec</i>                                       | Transformation of ELB332 into ELB115. | “               |
| ELB340                            | <i>sacA</i> :: $P_{sasA}$ - <i>yfp cm</i><br><i>amyE</i> :: $P_{ilvA}$ - <i>mcherry spec</i> $\Delta$ <i>sasA</i> :: <i>tet</i> | Transformation of ELB332 into ELB331. | “               |

|         |                                                                                                       |                                                                                                                            |   |
|---------|-------------------------------------------------------------------------------------------------------|----------------------------------------------------------------------------------------------------------------------------|---|
| ELB344  | <i>sacA::P<sub>sasA</sub>-yfp cm amyE::P<sub>sasA</sub>-mcherry spec</i>                              | Integration of pEL157 into ELB115.                                                                                         | “ |
| ELB345  | <i>amyE::P<sub>sigM</sub>-mcherry spec</i>                                                            | Integration of pEL158 into PB2.                                                                                            | “ |
| ELB346  | <i>sacA::P<sub>sigM</sub>-yfp cm</i>                                                                  | Integration of pEL159 into PB2.                                                                                            | “ |
| ELB348  | <i>sacA::P<sub>sasA</sub>-yfp cm amyE::P<sub>sigM</sub>-mcherry spec</i>                              | Transformation of ELB345 into ELB115.                                                                                      | “ |
| ELB349  | <i>sacA::P<sub>sigM</sub>-yfp cm</i>                                                                  | Transformation of ELB346 into PB2                                                                                          | “ |
| ELB350  | $\Delta$ <i>prpC sacA::P<sub>sigM</sub>-yfp cm</i>                                                    | Transformation of ELB346 into PB702.                                                                                       | “ |
| ELB351  | $\Delta$ ( <i>prpC-prkC</i> ) <i>sacA::P<sub>sigM</sub>-yfp cm</i>                                    | Transformation of ELB346 into PB722.                                                                                       | “ |
| ELB356  | <i>purA-aph-term-tRNAs-walR T101A</i>                                                                 | Direct transformation of Gibson assembled product <i>purA-aph-term-tRNAs-walR T101A</i> . into PB2. See below for details. | “ |
| ELB358  | <i>purA-aph-term-tRNAs-walR T101A</i>                                                                 | Transformation of ELB356 into PB2.                                                                                         | “ |
| ELB359  | <i>P<sub>sasA</sub>-luxABCDE mls bla purA-aph-term-tRNAs-walR T101A</i>                               | Transformation of ELB358 into ELB80.                                                                                       | “ |
| ELB360  | $\Delta$ <i>prpC P<sub>sasA</sub>-luxABCDE mls bla purA-aph-term-tRNAs-walR T101A</i>                 | Transformation of ELB358 into ELB81.                                                                                       | “ |
| ELB362  | $\Delta$ <i>prkC P<sub>sasA</sub>-luxABCDE mls bla purA-aph-term-tRNAs-walR T101A</i>                 | Transformation of ELB358 into ELB82.                                                                                       | “ |
| ELB367  | $\Delta$ ( <i>prpC-prkC</i> ) <i>P<sub>sasA</sub>-luxABCDE mls bla</i>                                | Transformation of EB1385 into PB722.                                                                                       | “ |
| ELB369B | $\Delta$ <i>prpC sacA::P<sub>sasA</sub>-yfp cm purA-aph-term-tRNAs-walR T101A</i>                     | Transformation of ELB358 into ELB116.                                                                                      | “ |
| ELB371  | <i>sacA::P<sub>sasA</sub>-yfp cm purA-aph-term-tRNAs-walR T101A</i>                                   | Transformation of ELB358 into ELB115.                                                                                      | “ |
| ELB373  | $\Delta$ ( <i>prpC-prkC</i> ) <i>sacA::P<sub>sasA</sub>-yfp cm purA-aph-term-tRNAs-walR T101A</i>     | Transformation of ELB369B into ELB330.                                                                                     | “ |
| ELB374  | $\Delta$ ( <i>prpC-prkC</i> ) <i>P<sub>sasA</sub>-luxABCDE mls bla purA-aph-term-tRNAs-walR T101A</i> | Transformation of ELB358 into ELB367.                                                                                      | “ |
| IP386   | <i>amyE::P<sub>veg</sub>-mcherry spec</i>                                                             | Integration of pIP384 into PB2.                                                                                            | “ |
| ELB499  | <i>sacA::P<sub>sasA</sub>-yfp cm amyE::P<sub>veg</sub>-mcherry spec</i>                               | Transformation of IP386 into ELB115.                                                                                       | “ |
| ELB450  | $\Delta$ <i>sasA::tet sacA::P<sub>sasA</sub>-yfp cm amyE::P<sub>veg</sub>-mcherry spec</i>            | Transformation of IP386 into ELB331.                                                                                       | “ |

248

#### 249 Construction of ELB356:

250 The Gibson assembled product *purA-aph-term-tRNAs-walR T101A* was created in two steps. In  
251 the first step, the *aph-term* encoding kanamycin resistance and a terminator was introduced

252 using Gibson assembly to create: '*purA-aph-term-tRNAs-walR-walk*' using the primers GA-  
253 purA-u1, GA-purA-l1, GA-aph-u1, GA-aph-l1, GA-termwalR-u1, GA-termwalR-l1 to amplify the  
254 chromosomal homology and pDG780 as the template for *aph*. Then a product containing the  
255 '*purA-aph-term-tRNAs-walR T101A-walk*' was created by soeing PCR using: purA-PCR-u2,  
256 walR-T101A-l1, walR-T101A-u1, walk-PCR-l1 using the product of the first step as a template.

257

258

259



260 **Table S3: Plasmids Used in this Study**

| Plasmid              |                                 |                                                                                                                                                                                                                                                                                                    |            |
|----------------------|---------------------------------|----------------------------------------------------------------------------------------------------------------------------------------------------------------------------------------------------------------------------------------------------------------------------------------------------|------------|
| <b>Stock Vectors</b> |                                 |                                                                                                                                                                                                                                                                                                    |            |
| pECE174-YFP          |                                 |                                                                                                                                                                                                                                                                                                    | (11)       |
| pDG780               |                                 |                                                                                                                                                                                                                                                                                                    | (12)       |
| pAF095               |                                 |                                                                                                                                                                                                                                                                                                    | Lab Stock  |
| pAF328               |                                 |                                                                                                                                                                                                                                                                                                    | Lab Stock  |
| pSac-cm              |                                 |                                                                                                                                                                                                                                                                                                    | (13)       |
|                      |                                 |                                                                                                                                                                                                                                                                                                    |            |
| Vector               | Genotype                        | Construction                                                                                                                                                                                                                                                                                       | Source     |
| pEL81                | pSac-cm $P_{sasA}$ -yfp         | $P_{sasA}$ -yfp transcriptional reporter in pSac-cm. Made by amplifying the <i>sasA</i> promoter using EcoRI-PywaC-u1 and BamHI-PywaC-l1. The resulting product was digested with EcoRI/BamHI and ligated to pECE174-YFP digested with same.                                                       | This study |
| pEL98                | pDG780 <i>sasA::tet</i>         | <i>sasA::tet</i> knockout vector. Made by gibson assembly into pDG780 digested with EcoRI/Sall. Primers used to assemble the inserts are: pDG780-ywaC-u1, Tet-ywaC-l1, ywaC-tet-u1, ywaC-tet-l1, Tet-ywaC-u1, pDG780-ywaC-l1. pAF095 was used as a template for <i>tet</i> .                       | “          |
| pEL151               | pDG1730 <i>rbs-mcherry spec</i> | RBS- <i>mcherry</i> vector for making <i>mcherry</i> transcriptional reporters for integration at <i>amyE</i> . Made by amplifying <i>mcherry</i> from pAF328 using HindIII-mCherry-u1 (introducing a new RBS) and BamHI-mCherry-l1. Digested the resulting product with BamHI/HindIII and ligated | “          |

|        |                                          |                                                                                                                                                                                                                                                                   |   |
|--------|------------------------------------------|-------------------------------------------------------------------------------------------------------------------------------------------------------------------------------------------------------------------------------------------------------------------|---|
|        |                                          | to pDG1730 digested with same.                                                                                                                                                                                                                                    |   |
| pEL152 | pDG1730 $P_{iVA}$ - <i>mcherry spec</i>  | $P_{iVA}$ - <i>mcherry</i> reporter for integration at <i>amyE</i> . Made by amplifying the <i>iVA</i> promoter region using EcoRI-PilvA-u1 and HindIII-PilvA-l1. The resulting product was digested with EcoRI/HindIII and ligated to pEL151 digested with same. | “ |
| pEL157 | pDG1730 $P_{sasA}$ - <i>mcherry spec</i> | $P_{sasA}$ - <i>mcherry</i> reporter for integration at <i>amyE</i> . Made by amplifying the <i>sasA</i> promoter region using EcoRI-PywaC-u1 and HindIII-PywaC-l2. The resulting product was digested with EcoRI/HindIII and ligated to pEL151 cut with same.    | “ |
| pEL158 | pDG1730 $P_{sigM}$ - <i>mcherry</i>      | $P_{sigM}$ - <i>mcherry</i> reporter for integration at <i>amyE</i> . Made by amplifying the <i>sigM</i> promoter using EcoRI-PsigM-u1 and HindIII-PsigM-l1. Digested the product with EcoRI/HindIII and ligated to pEL151 digested with same.                    | “ |
| pEL159 | pSac-cm $P_{sigM}$ - <i>yfp</i>          | $P_{sigM}$ - <i>yfp</i> reporter for integration at <i>sacA</i> . Made by amplifying the <i>sigM</i> promoter using EcoRI-PsigM-u1 and BamHI-PsigM-l1. Digested the product with EcoRI/BamHI and ligated to pECE174-YFP digested with same.                       | “ |
| pIP384 | pDG1730 $P_{veg}$ - <i>mcherry spec</i>  | $P_{veg}$ - <i>mcherry</i> reporter for integration at <i>amyE</i> . Made by phosphorylating                                                                                                                                                                      | “ |

|  |  |                                                                                                                                                             |  |
|--|--|-------------------------------------------------------------------------------------------------------------------------------------------------------------|--|
|  |  | and annealing primers encoding the veg promoter: IP_P_1130 and IP_P_1131. Digested the product with EcoRI/HindIII and ligated to pEL151 digested with same. |  |
|--|--|-------------------------------------------------------------------------------------------------------------------------------------------------------------|--|

261

262

263 **Table S4: Oligos used in this study**

| Name               | Sequence (5'-3')                                                           |
|--------------------|----------------------------------------------------------------------------|
| EcoRI-PywaC-u1     | GGCTAGAATTCGTCCAGAACGAAATGCCGATG                                           |
| BamHI-PywaC-l1     | GGCTAGGATCCCCGGAAC TTTATCCGCTGTCC                                          |
| pDG780-ywaC-u1     | TTGGGTACCGGGCCCCCCTCGAGGTCGACATTCAGACAGATAAGATCAATATG                      |
| Tet-ywaC-l1        | ACAATATGGCCCCGCTTTAACGGAAC TTTATCCG                                        |
| ywaC-tet-u1        | AGTTCGGTTAAAGCGGGCCATATTGTTGTATAAG                                         |
| ywaC-tet-l1        | TTTCTCATCTAGGGAAC TCTCTCCCAAAGTTG                                          |
| Tet-ywaC-u1        | TGGGAGAGAGTTCCTAGATGAGAAAATGCTGG                                           |
| pDG780-ywaC-l1     | ACTAGTGGATCCCCGGGCTGCAGGAATTCGTGAAC T TCAACTTAGATATGGTAG                   |
| HindIII-mCherry-u1 | GGTCAAAGCTTAAAGGAGGAAAGTCACATTATGGTTTCCAAGGGCGAGG                          |
| BamHI-mCherry-l1   | GGTCAGGATCCTTATTTGTACAGCTCATCC                                             |
| EcoRI-PilvA-u1     | GGTCAGAATTCGGTGCAC TATTCATCAATTGGC                                         |
| HindIII-PilvA-l1   | GGTCAAAGCTTGTTTTAAATCCCTATTTAATATG                                         |
| HindIII-PywaC-l2   | GGTCAAAGCTTCGGAAC TTTATCCGCTGTCC                                           |
| EcoRI-PsigM-u1     | GGCTAGAATTCCACTATCTTTTCCCCTCTGG                                            |
| HindIII-PsigM-l1   | GGTCAAAGCTTCTATGTTATACACGCATAAG                                            |
| BamHI-PsigM-l1     | GGCTAGGATCCCTATGTTATACACGCATAAG                                            |
| IP_P_1130          | AGCTCATTTATTGTACAACACGAGCCCATTTTTGTCAAATAAAATTTAAATTATATC<br>AACGTTAATAAGG |
| IP_P_1131          | AATTCCTTATTAACGTTGATATAATTTAAATTTATTTGACAAAAATGGGCTCGTGT<br>TGACAATAAATG   |

264

265

266 **References**

- 267 1. Wang JD, Sanders GM, & Grossman AD (2007) Nutritional control of elongation of DNA  
268 replication by (p)ppGpp. *Cell* 128(5):865-875.
- 269 2. Vasantha N & Freese E (1980) Enzyme changes during *Bacillus subtilis* sporulation  
270 caused by deprivation of guanine nucleotides. *J Bacteriol* 144(3):1119-1125.
- 271 3. Harwood CR & Cutting SM eds (1990) *Molecular biological methods for Bacillus* (Wiley,  
272 New York).
- 273 4. Schindelin J, *et al.* (2012) Fiji: an open-source platform for biological-image analysis. *Nat*  
274 *Methods* 9(7):676-682.
- 275 5. Miyashiro T & Goulian M (2007) Single-cell analysis of gene expression by fluorescence  
276 microscopy. *Methods Enzymol* 423:458-475.
- 277 6. Libby EA, Goss LA, & Dworkin J (2015) The Eukaryotic-Like Ser/Thr Kinase PrkC  
278 Regulates the Essential WalRK Two-Component System in *Bacillus subtilis*. *PLoS*  
279 *Genet* 11(6):e1005275.
- 280 7. Corsetti JP, *et al.* (1988) Correction of cellular autofluorescence in flow cytometry by  
281 mathematical modeling of cellular fluorescence. *Cytometry* 9(6):539-547.
- 282 8. Taniguchi Y, *et al.* (2010) Quantifying *E. coli* proteome and transcriptome with single-  
283 molecule sensitivity in single cells. *Science* 329(5991):533-538.
- 284 9. Gaidenko TA, Kim TJ, & Price CW (2002) The PrpC serine-threonine phosphatase and  
285 PrkC kinase have opposing physiological roles in stationary-phase *Bacillus subtilis* cells.  
286 *J Bacteriol* 184(22):6109-6114.
- 287 10. D'Elia MA, *et al.* (2009) Probing teichoic acid genetics with bioactive molecules reveals  
288 new interactions among diverse processes in bacterial cell wall biogenesis. *Chemistry &*  
289 *biology* 16(5):548-556.
- 290 11. Eldar A, *et al.* (2009) Partial penetrance facilitates developmental evolution in bacteria.  
291 *Nature* 460(7254):510-514.
- 292 12. Guerout-Fleury AM, Shazand K, Frandsen N, & Stragier P (1995) Antibiotic-resistance  
293 cassettes for *Bacillus subtilis*. *Gene* 167(1-2):335-336.
- 294 13. Middleton R & Hofmeister A (2004) New shuttle vectors for ectopic insertion of genes  
295 into *Bacillus subtilis*. *Plasmid* 51(3):238-245.
- 296
